# Supplementary material for: Exploring functional variant discovery in non-coding regions with SInBaD
Source: PubMed Central journal article supplement — Nucleic Acids Res. 2012 Aug 30;41(1):e7. doi: 10.1093/nar/gks800 (PMC3592431; doi:10.1093/nar/gks800), 2012-08-30
Supplement: supp_gks800_nar-01484-met-n-2012-File008.pdf [file supp_gks800_nar-01484-met-n-2012-File008.pdf]

# Supplemental

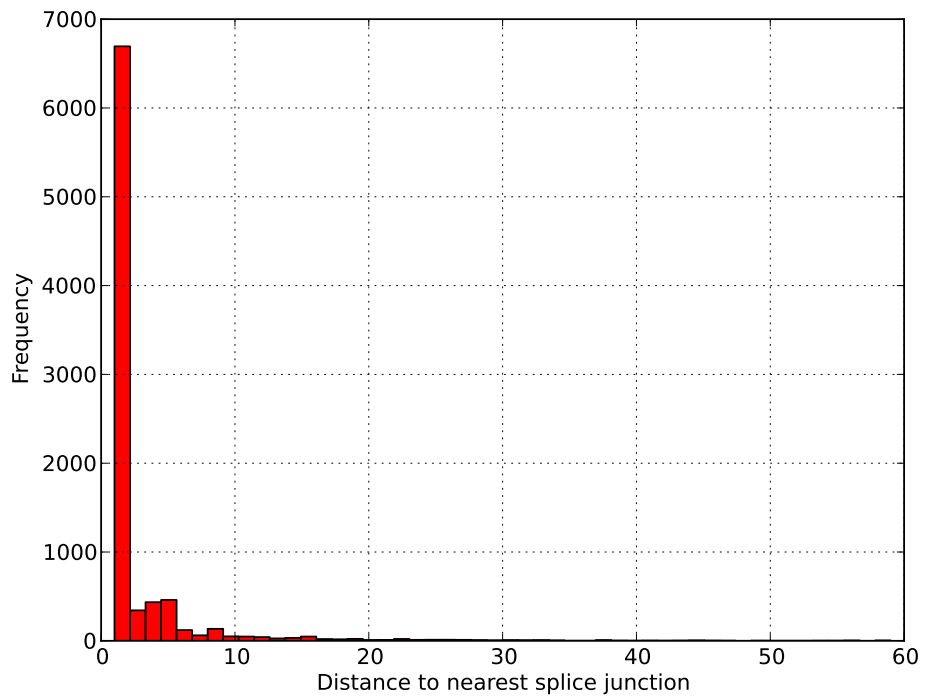

Figure 1: Distribution of distance to nearest splice junction of known HGMD mutations.

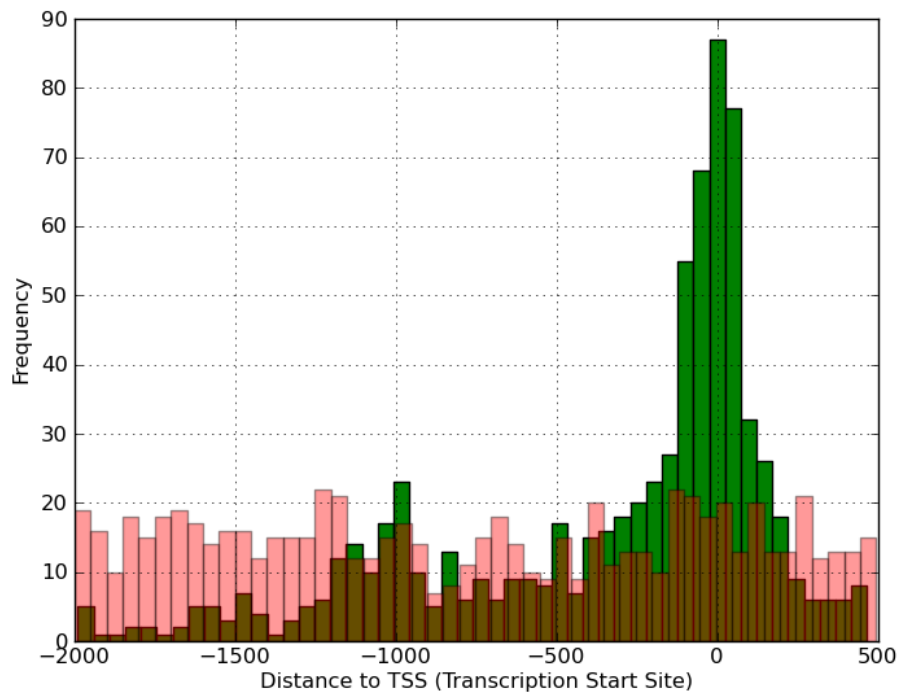

Figure 2: Comparison of distance to TSS. Green is the distribution of the distance to transcription start site of HGMD annotated variants, and red shows the distribution of the randomly selected background dataset.

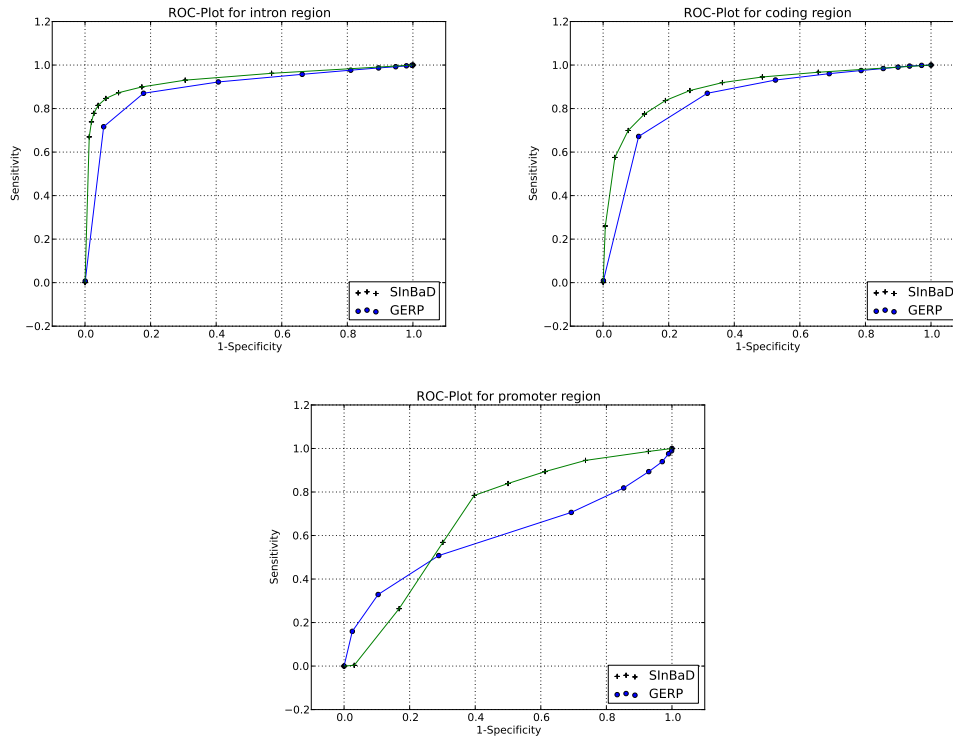

Figure 3: Specificity/Sensitivity comparison between SInBaD and GERP across the different gene regions.

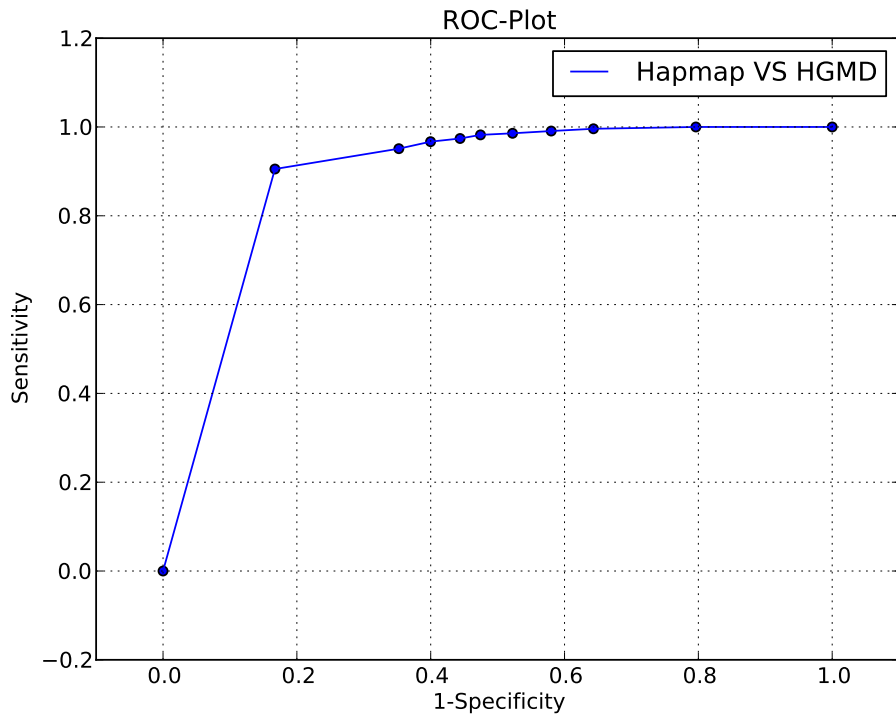

Figure 4: Comparison of Sensitivity/Specificity trade-off using 2,000 HapMap variants as supposedly non-functional variants and selecting 2,000 random disease mutations(50% coding and 50% intron) taken from HGMD. The model reasonably distinguishes HapMap variants from actual disease variants.

|                                             | Accuracy | Specificity | Sensitivity | Size  |
|---------------------------------------------|----------|-------------|-------------|-------|
| -500bp to +500bp(conservation)              | 56.57%   | 62.14%      | 51.20%      | 1,408 |
| -2,000bp to +500bp(conservation)            | 59.37%   | 61.16%      | 57.6%       | 1,751 |
| -500bp to +500bp(conservation + distance)   | 58.07%   | 58.09%      | 58.22%      | 1,408 |
| -2,000bp to +500bp(conservation + distance) | 71.31%   | 80.54%      | 62.21%      | 1,751 |

Table 1: 10 fold cross-validation results comparing training data in promoter region, selected by different window definitions around the transcription start site.
